# Supplementary material
Source: PubMed Central journal article supplement (PMC3416361)
Supplement: supp_78.14.4869_AEM00841-12_supplemental.pdf [file supp_78.14.4869_AEM00841-12_supplemental.pdf]

TABLE S2 Yeast species and source of isolation with BLAST GenBank numbers. Source: AF, adult female; AM, adult male; I, infested; U, uninfested. Fruit: R, raspberry; C, cherry.

| Source                   | Date       | Location        | Fruit       | Phaff Culture ID | BLAST     | Homology | Bp  | GenBank Match | Genus                | Species          |
|--------------------------|------------|-----------------|-------------|------------------|-----------|----------|-----|---------------|----------------------|------------------|
| <i>D. suzukii</i> AF     | 7/21/2011  | Watsonville, CA | Pacifica R  | UCDFST 11-365    | 2/16/2012 | 99.81    | 527 | JN083823.1    | <i>Hanseniaspora</i> | <i>uvarum</i>    |
| <i>D. suzukii</i> AF     | 7/21/2011  | Watsonville, CA | Pacifica R  | UCDFST 11-371    | 2/16/2012 | 100      | 520 | JN083823.1    | <i>Hanseniaspora</i> | <i>uvarum</i>    |
| <i>D. suzukii</i> AF     | 7/21/2011  | Watsonville, CA | Pacifica R  | UCDFST 11-382    | 2/16/2012 | 100      | 529 | JN083823.1    | <i>Hanseniaspora</i> | <i>uvarum</i>    |
| <i>D. suzukii</i> AF     | 7/21/2011  | Watsonville, CA | Pacifica R  | UCDFST 11-384    | 2/16/2012 | 99.81    | 534 | JN083823.1    | <i>Hanseniaspora</i> | <i>uvarum</i>    |
| <i>D. suzukii</i> AF     | 7/21/2011  | Watsonville, CA | Pacifica R  | UCDFST 11-385    | 2/16/2012 | 100      | 421 | U76345.1      | <i>Pichia</i>        | <i>terricola</i> |
| <i>D. suzukii</i> AF     | 6/3/2011   | Davis, CA       | Unknown C   | UCDFST 11-329    | 2/16/2012 | 99.81    | 551 | JN083823.1    | <i>Hanseniaspora</i> | <i>uvarum</i>    |
| <i>D. suzukii</i> AF     | 6/3/2011   | Davis, CA       | Unknown C   | UCDFST 11-344    | 2/16/2012 | 99.81    | 552 | JN083823.1    | <i>Hanseniaspora</i> | <i>uvarum</i>    |
| <i>D. suzukii</i> AF     | 7/21/2011  | Davis, CA       | Unknown C   | UCDFST 11-330    | 2/16/2012 | 99.81    | 540 | EF550251.1    | <i>Pichia</i>        | <i>kluyveri</i>  |
| <i>D. suzukii</i> AM     | 7/21/2011  | Watsonville, CA | Pacifica R  | UCDFST 11-369    | 2/16/2012 | 98.76    | 499 | AY013719.1    | <i>Candida</i>       | <i>xylopsoci</i> |
| <i>D. suzukii</i> AM     | 7/21/2011  | Watsonville, CA | Pacifica R  | UCDFST 11-368    | 2/16/2012 | 100      | 513 | JN083823.1    | <i>Hanseniaspora</i> | <i>uvarum</i>    |
| <i>D. suzukii</i> AM     | 7/21/2011  | Watsonville, CA | Pacifica R  | UCDFST 11-372    | 2/16/2012 | 100      | 539 | JN083823.1    | <i>Hanseniaspora</i> | <i>uvarum</i>    |
| <i>D. suzukii</i> AM     | 7/21/2011  | Watsonville, CA | Pacifica R  | UCDFST 11-374    | 2/16/2012 | 100      | 508 | JN083823.1    | <i>Hanseniaspora</i> | <i>uvarum</i>    |
| <i>D. suzukii</i> AM     | 7/21/2011  | Watsonville, CA | Pacifica R  | UCDFST 11-378    | 2/16/2012 | 100      | 512 | JN083823.1    | <i>Hanseniaspora</i> | <i>uvarum</i>    |
| <i>D. suzukii</i> AM     | 6/3/2011   | Davis, CA       | Unknown C   | UCDFST 11-331    | 2/16/2012 | 99.56    | 458 | JN083823.1    | <i>Hanseniaspora</i> | <i>uvarum</i>    |
| <i>D. suzukii</i> larvae | 10/14/2010 | Watsonville, CA | Isabel R    | UCDFST 10-268    | 2/16/2012 | 100      | 555 | JN083823.1    | <i>Hanseniaspora</i> | <i>uvarum</i>    |
| <i>D. suzukii</i> larvae | 10/14/2010 | Watsonville, CA | Isabel R    | UCDFST 10-270    | 2/16/2012 | 100      | 526 | JN083823.1    | <i>Hanseniaspora</i> | <i>uvarum</i>    |
| <i>D. suzukii</i> larvae | 6/23/2011  | Watsonville, CA | Isabel R    | UCDFST 11-349    | 2/16/2012 | 99.63    | 548 | JN083823.1    | <i>Hanseniaspora</i> | <i>uvarum</i>    |
| <i>D. suzukii</i> larvae | 6/23/2011  | Watsonville, CA | Isabel R    | UCDFST 11-347    | 2/16/2012 | 99.63    | 545 | JN083823.1    | <i>Hanseniaspora</i> | <i>uvarum</i>    |
| <i>D. suzukii</i> larvae | 6/23/2011  | Watsonville, CA | Isabel R    | UCDFST 11-350    | 2/16/2012 | 99.59    | 502 | U76345.1      | <i>Pichia</i>        | <i>terricola</i> |
| <i>D. suzukii</i> larvae | 7/15/2011  | Watsonville, CA | Isabel R    | UCDFST 11-388    | 2/16/2012 | 99.81    | 531 | JN083823.1    | <i>Hanseniaspora</i> | <i>uvarum</i>    |
| <i>D. suzukii</i> larvae | 7/15/2011  | Watsonville, CA | Isabel R    | UCDFST 11-391    | 2/16/2012 | 99.81    | 554 | JN083823.1    | <i>Hanseniaspora</i> | <i>uvarum</i>    |
| <i>D. suzukii</i> larvae | 7/15/2011  | Watsonville, CA | Isabel R    | UCDFST 11-389    | 2/16/2012 | 99.81    | 531 | FM180553.1    | <i>Pichia</i>        | <i>kluyveri</i>  |
| <i>D. suzukii</i> larvae | 7/15/2011  | Watsonville, CA | Isabel R    | UCDFST 11-392    | 2/16/2012 | 99.64    | 558 | FM180553.1    | <i>Pichia</i>        | <i>kluyveri</i>  |
| <i>D. suzukii</i> larvae | 9/30/2010  | Watsonville, CA | Maravilla R | UCDFST 10-265    | 2/16/2012 | 100      | 496 | AB543319.1    | <i>Candida</i>       | <i>asiatica</i>  |
| <i>D. suzukii</i> larvae | 9/30/2010  | Watsonville, CA | Maravilla R | UCDFST 10-266    | 2/16/2012 | 100      | 495 | DQ466528.1    | <i>Candida</i>       | <i>diversa</i>   |

|                          |            |                 |             |                |           |       |     |            |                      |                    |
|--------------------------|------------|-----------------|-------------|----------------|-----------|-------|-----|------------|----------------------|--------------------|
| <i>D. sukukii</i> larvae | 9/30/2010  | Watsonville, CA | Maravilla R | UCDFST 10-267  | 2/16/2012 | 99.81 | 555 | JN083823.1 | <i>Hanseniaspora</i> | <i>uvarum</i>      |
| <i>D. sukukii</i> larvae | 10/14/2010 | Watsonville, CA | Maravilla R | UCDFST 10-269  | 2/16/2012 | 100   | 556 | JN083823.1 | <i>Hanseniaspora</i> | <i>uvarum</i>      |
| <i>D. sukukii</i> larvae | 7/15/2011  | Watsonville, CA | Maravilla R | UCDFST 11-386  | 2/16/2012 | 99.81 | 559 | JN083823.1 | <i>Hanseniaspora</i> | <i>uvarum</i>      |
| <i>D. sukukii</i> larvae | 7/15/2011  | Watsonville, CA | Maravilla R | UCDFST 11-387  | 2/16/2012 | 100   | 542 | JN083823.1 | <i>Hanseniaspora</i> | <i>uvarum</i>      |
| <i>D. sukukii</i> larvae | 7/21/2011  | Watsonville, CA | Maravilla R | UCDFST 11-367  | 2/16/2012 | 99.81 | 551 | DQ377663.1 | <i>Cryptococcus</i>  | <i>magnus</i>      |
| <i>D. sukukii</i> larvae | 7/21/2011  | Watsonville, CA | Maravilla R | UCDFST 11-366  | 2/16/2012 | 100   | 525 | JN083823.1 | <i>Hanseniaspora</i> | <i>uvarum</i>      |
| <i>D. sukukii</i> larvae | 7/21/2011  | Watsonville, CA | Maravilla R | UCDFST 11-370  | 2/16/2012 | 100   | 514 | JN083823.1 | <i>Hanseniaspora</i> | <i>uvarum</i>      |
| <i>D. sukukii</i> larvae | 10/14/2010 | Watsonville, CA | Pacifica R  | UCDFST 10-271  | 2/16/2012 | 100   | 556 | HM988687.1 | <i>Hanseniaspora</i> | <i>uvarum</i>      |
| <i>D. sukukii</i> larvae | 6/23/2011  | Watsonville, CA | Pacifica R  | UCDFST 11-351  | 2/16/2012 | 99.81 | 545 | JN083823.1 | <i>Hanseniaspora</i> | <i>uvarum</i>      |
| <i>D. sukukii</i> larvae | 6/23/2011  | Watsonville, CA | Pacifica R  | UCDFST 11-353  | 2/16/2012 | 99.07 | 538 | JN083823.1 | <i>Hanseniaspora</i> | <i>uvarum</i>      |
| <i>D. sukukii</i> larvae | 6/23/2011  | Watsonville, CA | Pacifica R  | UCDFST 11-354  | 2/16/2012 | 99.6  | 508 | U76345.1   | <i>Pichia</i>        | <i>terricola</i>   |
| <i>D. sukukii</i> larvae | 7/15/2011  | Watsonville, CA | Pacifica R  | UCDFST 11-396  | 2/16/2012 | 99.81 | 532 | JN083823.1 | <i>Hanseniaspora</i> | <i>uvarum</i>      |
| <i>D. sukukii</i> larvae | 7/15/2011  | Watsonville, CA | Pacifica R  | UCDFST 11-394  | 2/16/2012 | 99.81 | 549 | JN083823.1 | <i>Hanseniaspora</i> | <i>uvarum</i>      |
| <i>D. sukukii</i> larvae | 7/15/2011  | Watsonville, CA | Pacifica R  | UCDFST 11-395  | 2/16/2012 | 99.62 | 530 | U76345.1   | <i>Pichia</i>        | <i>terricola</i>   |
| <i>D. sukukii</i> larvae | 7/21/2011  | Watsonville, CA | Pacifica R  | UCDFST 11-378  | 2/17/2012 | 100   | 512 | JN083823.1 | <i>Hanseniaspora</i> | <i>uvarum</i>      |
| <i>D. sukukii</i> larvae | 7/21/2011  | Watsonville, CA | Pacifica R  | UCDFST 11-380  | 2/17/2012 | 100   | 522 | JN083823.1 | <i>Hanseniaspora</i> | <i>uvarum</i>      |
| <i>D. sukukii</i> larvae | 8/12/2011  | Corvallis, OR   | Rainier C   | UCDFST 11-1009 | 2/17/2012 | 99.29 | 561 | HM988687.1 | <i>Hanseniaspora</i> | <i>uvarum</i>      |
| <i>D. sukukii</i> larvae | 8/12/2011  | Corvallis, OR   | Rainier C   | UCDFST 11-1005 | 2/17/2012 | 99.81 | 546 | JN083823.1 | <i>Hanseniaspora</i> | <i>uvarum</i>      |
| <i>D. sukukii</i> larvae | 8/12/2011  | Corvallis, OR   | Rainier C   | UCDFST 11-1006 | 2/17/2012 | 99.81 | 531 | JN083823.1 | <i>Hanseniaspora</i> | <i>uvarum</i>      |
| <i>D. sukukii</i> larvae | 8/12/2011  | Corvallis, OR   | Rainier C   | UCDFST 11-1012 | 2/17/2012 | 100   | 551 | JN083823.1 | <i>Hanseniaspora</i> | <i>uvarum</i>      |
| <i>D. sukukii</i> larvae | 6/22/2011  | Davis, CA       | Royal Ann C | UCDFST 11-356  | 2/17/2012 | 100   | 523 | HM988687.1 | <i>Hanseniaspora</i> | <i>uvarum</i>      |
| <i>D. sukukii</i> larvae | 6/22/2011  | Davis, CA       | Royal Ann C | UCDFST 11-355  | 2/17/2012 | 99.81 | 527 | JN083823.1 | <i>Hanseniaspora</i> | <i>uvarum</i>      |
| <i>D. sukukii</i> larvae | 6/3/2011   | Davis, CA       | Unknown C   | UCDFST 11-320  | 2/17/2012 | 99.79 | 485 | U45831.1   | <i>Candida</i>       | <i>quercitrusa</i> |
| <i>D. sukukii</i> larvae | 6/3/2011   | Davis, CA       | Unknown C   | UCDFST 11-322  | 2/17/2012 | 100   | 486 | JN083823.1 | <i>Hanseniaspora</i> | <i>uvarum</i>      |
| <i>D. sukukii</i> larvae | 6/3/2011   | Davis, CA       | Unknown C   | UCDFST 11-323  | 2/17/2012 | 99.5  | 466 | JN083823.1 | <i>Hanseniaspora</i> | <i>uvarum</i>      |
| <i>D. sukukii</i> larvae | 6/3/2011   | Davis, CA       | Unknown C   | UCDFST 11-327  | 2/17/2012 | 99.56 | 455 | JN083823.1 | <i>Hanseniaspora</i> | <i>uvarum</i>      |
| <i>D. sukukii</i> larvae | 6/3/2011   | Davis, CA       | Unknown C   | UCDFST 11-324  | 2/17/2012 | 100   | 508 | FM180553.1 | <i>Pichia</i>        | <i>kluyveri</i>    |
| <i>D. sukukii</i> larvae | 6/3/2011   | Davis, CA       | Unknown C   | UCDFST 11-326  | 2/17/2012 | 99.4  | 504 | FM180553.1 | <i>Pichia</i>        | <i>kluyveri</i>    |
| <i>D. sukukii</i> larvae | 6/8/2011   | Winters, CA     | Unknown C   | UCDFST 11-333  | 2/17/2012 | 100   | 492 | HM988687.1 | <i>Hanseniaspora</i> | <i>uvarum</i>      |

|                          |           |                 |             |                |           |       |     |            |                       |                       |
|--------------------------|-----------|-----------------|-------------|----------------|-----------|-------|-----|------------|-----------------------|-----------------------|
| <i>D. suzukii</i> larvae | 6/8/2011  | Winters, CA     | Unknown C   | UCDFST 11-338  | 2/17/2012 | 100   | 545 | JN083823.1 | <i>Hanseniaspora</i>  | <i>uvarum</i>         |
| <i>D. suzukii</i> larvae | 6/8/2011  | Winters, CA     | Unknown C   | UCDFST 11-343  | 2/17/2012 | 98.91 | 459 | JN051406.1 | <i>Metschnikowia</i>  | <i>pulcherrima</i>    |
| <i>D. suzukii</i> larvae | 6/8/2011  | Winters, CA     | Unknown C   | UCDFST 11-345  | 2/17/2012 | 98.68 | 455 | JN051406.1 | <i>Metschnikowia</i>  | <i>pulcherrima</i>    |
| <i>D. suzukii</i> larvae | 6/14/2011 | Davis, CA       | Unknown C   | UCDFST 11-359  | 2/17/2012 | 99.63 | 551 | JN083823.1 | <i>Hanseniaspora</i>  | <i>uvarum</i>         |
| <i>D. suzukii</i> larvae | 6/14/2011 | Davis, CA       | Unknown C   | UCDFST 11-363  | 2/17/2012 | 99.55 | 447 | JN083823.1 | <i>Hanseniaspora</i>  | <i>uvarum</i>         |
| <i>D. suzukii</i> larvae | 6/14/2011 | Davis, CA       | Unknown C   | UCDFST 11-364  | 2/17/2012 | 99.8  | 508 | FM180553.1 | <i>Pichia</i>         | <i>kluyveri</i>       |
| Fruit juice- U           | 6/23/2011 | Watsonville, CA | Isabel R    | UCDFST 11-911  | 2/17/2012 | 100   | 564 | HM988687.1 | <i>Hanseniaspora</i>  | <i>uvarum</i>         |
| Fruit juice- U           | 6/23/2011 | Watsonville, CA | Maravilla R | UCDFST 11-892  | 2/17/2012 | 100   | 565 | JN083823.1 | <i>Hanseniaspora</i>  | <i>uvarum</i>         |
| Fruit juice- U           | 6/23/2011 | Watsonville, CA | Maravilla R | UCDFST 11-893  | 2/17/2012 | 99.6  | 507 | U44825.1   | <i>Metschnikowia</i>  | <i>reukaufii</i>      |
| Fruit juice- U           | 7/21/2011 | Watsonville, CA | Maravilla R | UCDFST 11-1061 | 2/17/2012 | 100   | 544 | GQ121603.1 | <i>Debaryomyces</i>   | 4/6/2012              |
| Fruit juice- U           | 7/21/2011 | Watsonville, CA | Maravilla R | UCDFST 11-1063 | 2/17/2012 | 99.81 | 554 | JN083823.1 | <i>Hanseniaspora</i>  | <i>uvarum</i>         |
| Fruit juice- U           | 7/21/2011 | Watsonville, CA | Maravilla R | UCDFST 11-1059 | 2/17/2012 | 99.79 | 484 | AF406914.1 | <i>Metschnikowia</i>  | <i>gruessii</i>       |
| Fruit juice- U           | 7/21/2011 | Watsonville, CA | Maravilla R | UCDFST 11-1060 | 2/17/2012 | 100   | 585 | AF075507.1 | <i>Udeniomyces</i>    | <i>pyricola</i>       |
| Fruit juice- U           | 6/23/2011 | Watsonville, CA | Pacifica R  | UCDFST 11-941  | 2/17/2012 | 100   | 564 | HM988687.1 | <i>Hanseniaspora</i>  | <i>uvarum</i>         |
| Fruit juice- U           | 6/23/2011 | Watsonville, CA | Pacifica R  | UCDFST 11-986  | 2/17/2012 | 100   | 556 | JF766630.1 | <i>Meyerozyma</i>     | <i>guilliermondii</i> |
| Fruit juice- U           | 6/23/2011 | Watsonville, CA | Pacifica R  | UCDFST 11-952  | 2/17/2012 | 99.81 | 547 | EF550233.1 | <i>Pichia</i>         | <i>terricola</i>      |
| Fruit juice- U           | 7/21/2011 | Watsonville, CA | Pacifica R  | UCDFST 11-1134 | 2/17/2012 | 100   | 556 | AB220034.1 | <i>Debaryomyces</i>   | <i>nepalensis</i>     |
| Fruit juice- U           | 7/21/2011 | Watsonville, CA | Pacifica R  | UCDFST 11-954  | 2/17/2012 | 100   | 564 | HM988687.1 | <i>Hanseniaspora</i>  | <i>uvarum</i>         |
| Fruit juice- U           | 7/21/2011 | Watsonville, CA | Pacifica R  | UCDFST 11-1108 | 2/17/2012 | 99.37 | 489 | AF406914.1 | <i>Metschnikowia</i>  | <i>gruessii</i>       |
| Fruit juice- U           | 8/12/2011 | Corvallis, OR   | Ranier C    | UCDFST 11-810  | 2/17/2012 | 99.81 | 548 | GU585247.1 | <i>Aureobasidium</i>  | <i>pullulans</i>      |
| Fruit juice- U           | 8/12/2011 | Corvallis, OR   | Ranier C    | UCDFST 11-995  | 2/17/2012 | 99.49 | 585 | HM627067.1 | <i>Cryptococcus</i>   | <i>magnus</i>         |
| Fruit juice- U           | 8/12/2011 | Corvallis, OR   | Ranier C    | UCDFST 11-1151 | 2/17/2012 | 99.65 | 578 | AF459664.1 | <i>Cryptococcus</i>   | <i>macerans</i>       |
| Fruit juice- U           | 8/12/2011 | Corvallis, OR   | Ranier C    | UCDFST 11-1157 | 2/17/2012 | 100   | 567 | EU194455.1 | <i>Cryptococcus</i>   | <i>victoriae</i>      |
| Fruit juice- U           | 8/12/2011 | Corvallis, OR   | Ranier C    | UCDFST 11-987  | 2/17/2012 | 100   | 552 | HQ149311.1 | <i>Hanseniaspora</i>  | <i>uvarum</i>         |
| Fruit juice- U           | 8/12/2011 | Corvallis, OR   | Ranier C    | UCDFST 11-1143 | 2/17/2012 | 100   | 420 | AF189994.1 | <i>Sporobolomyces</i> | <i>ruberrimus</i>     |
| Fruit juice- U           | 8/12/2011 | Corvallis, OR   | Ranier C    | UCDFST 11-985  | 2/17/2012 | 98.55 | 415 | AY364837.1 | <i>Sporobolomyces</i> | <i>beijingensis</i>   |
| Fruit juice- U           | 8/12/2011 | Corvallis, OR   | Ranier C    | UCDFST 11-996  | 2/17/2012 | 100   | 586 | AF075507.1 | <i>Udeniomyces</i>    | <i>pyricola</i>       |
| Fruit juice- U           | 6/23/2011 | Davis, CA       | Royal Ann C | UCDFST 11-869  | 2/17/2012 | 100   | 588 | EU194455.1 | <i>Cryptococcus</i>   | <i>victoriae</i>      |
| Fruit juice- U           | 6/12/2011 | Davis, CA       | Unknown C   | UCDFST 11-805  | 2/17/2012 | 99.83 | 588 | JN214488.1 | <i>Cryptococcus</i>   | <i>carnescens</i>     |

|                |           |                 |             |                |           |       |     |            |                       |                       |
|----------------|-----------|-----------------|-------------|----------------|-----------|-------|-----|------------|-----------------------|-----------------------|
| Fruit juice- U | 6/14/2011 | Davis, CA       | Unknown C   | UCDFST 11-832  | 2/17/2012 | 100   | 482 | GQ911488.1 | <i>Aureobasidium</i>  | <i>pullulans</i>      |
| Fruit juice- U | 6/14/2011 | Davis, CA       | Unknown C   | UCDFST 11-803  | 2/17/2012 | 99.64 | 558 | GU585247.1 | <i>Aureobasidium</i>  | <i>pullulans</i>      |
| Fruit juice- U | 6/14/2011 | Davis, CA       | Unknown C   | UCDFST 11-806  | 2/17/2012 | 99.49 | 590 | HM627067.1 | <i>Cryptococcus</i>   | <i>magnus</i>         |
| Fruit juice- U | 6/14/2011 | Davis, CA       | Unknown C   | UCDFST 11-822  | 2/17/2012 | 99.65 | 585 | DQ377662.1 | <i>Cryptococcus</i>   | <i>macerans</i>       |
| Fruit juice- U | 6/14/2011 | Davis, CA       | Unknown C   | UCDFST 11-831  | 2/17/2012 | 99.49 | 588 | DQ377664.1 | <i>Cryptococcus</i>   | <i>victoriae</i>      |
| Fruit juice- U | 6/14/2011 | Davis, CA       | Unknown C   | UCDFST 11-833  | 2/17/2012 | 99.49 | 587 | JN214488.1 | <i>Cryptococcus</i>   | <i>carnescens</i>     |
| Fruit juice- U | 6/14/2011 | Davis, CA       | Unknown C   | UCDFST 11-802  | 2/17/2012 | 100   | 564 | HM988687.1 | <i>Hanseniaspora</i>  | <i>uvarum</i>         |
| Fruit juice- U | 6/14/2011 | Davis, CA       | Unknown C   | UCDFST 11-820  | 2/17/2012 | 100   | 564 | HM988687.1 | <i>Hanseniaspora</i>  | <i>uvarum</i>         |
| Fruit juice- U | 6/14/2011 | Davis, CA       | Unknown C   | UCDFST 11-821  | 2/17/2012 | 98.19 | 552 | AY364837.1 | <i>Sporobolomyces</i> | <i>beijingensis</i>   |
| Fruit juice-I  | 6/23/2011 | Watsonville, CA | Isabel R    | UCDFST 11-925  | 2/17/2012 | 100   | 565 | JN083823.1 | <i>Hanseniaspora</i>  | <i>uvarum</i>         |
| Fruit juice-I  | 6/23/2011 | Watsonville, CA | Isabel R    | UCDFST 11-913  | 2/17/2012 | 100   | 560 | FM180530.1 | <i>Pichia</i>         | <i>kluyveri</i>       |
| Fruit juice-I  | 6/23/2011 | Watsonville, CA | Isabel R    | UCDFST 11-915  | 2/17/2012 | 100   | 544 | EF550233.1 | <i>Pichia</i>         | <i>terricola</i>      |
| Fruit juice-I  | 6/23/2011 | Davis, CA       | Maravilla R | UCDFST 11-902  | 2/17/2012 | 98.32 | 476 | DQ513283.1 | <i>Cryptococcus</i>   | <i>festucosus</i>     |
| Fruit juice-I  | 6/23/2011 | Watsonville, CA | Maravilla R | UCDFST 11-906  | 2/17/2012 | 100   | 552 | JN083823.1 | <i>Hanseniaspora</i>  | <i>uvarum</i>         |
| Fruit juice-I  | 6/23/2011 | Watsonville, CA | Maravilla R | UCDFST 11-897  | 2/17/2012 | 100   | 502 | EU439452.1 | <i>Metschnikowia</i>  | <i>reukaufii</i>      |
| Fruit juice-I  | 6/23/2011 | Watsonville, CA | Maravilla R | UCDFST 11-898  | 2/17/2012 | 99.61 | 508 | AB304086.1 | <i>Moniliella</i>     | <i>megachiliensis</i> |
| Fruit juice-I  | 6/23/2011 | Watsonville, CA | Maravilla R | UCDFST 11-901  | 2/17/2012 | 100   | 566 | AF387126.1 | <i>Sporobolomyces</i> | <i>odoratus</i>       |
| Fruit juice-I  | 7/21/2011 | Watsonville, CA | Maravilla R | UCDFST 11-1082 | 2/17/2012 | 100   | 556 | HM123744.1 | <i>Hanseniaspora</i>  | <i>occidentalis</i>   |
| Fruit juice-I  | 7/21/2011 | Watsonville, CA | Maravilla R | UCDFST 11-910  | 2/17/2012 | 100   | 555 | JN083823.1 | <i>Hanseniaspora</i>  | <i>uvarum</i>         |
| Fruit juice-I  | 7/21/2011 | Watsonville, CA | Maravilla R | UCDFST 11-1073 | 2/17/2012 | 99.81 | 540 | U76345.1   | <i>Pichia</i>         | <i>terricola</i>      |
| Fruit juice-I  | 6/23/2011 | Watsonville, CA | Pacifica R  | UCDFST 11-957  | 2/17/2012 | 100   | 561 | HM988687.1 | <i>Hanseniaspora</i>  | <i>uvarum</i>         |
| Fruit juice-I  | 6/23/2011 | Watsonville, CA | Pacifica R  | UCDFST 11-972  | 2/17/2012 | 99.82 | 561 | HM123744.1 | <i>Hanseniaspora</i>  | <i>occidentalis</i>   |
| Fruit juice-I  | 6/23/2011 | Watsonville, CA | Pacifica R  | UCDFST 11-960  | 2/17/2012 | 99.82 | 557 | EF550251.1 | <i>Pichia</i>         | <i>kluyveri</i>       |
| Fruit juice-I  | 6/23/2011 | Watsonville, CA | Pacifica R  | UCDFST 11-959  | 2/17/2012 | 100   | 543 | EF550233.1 | <i>Pichia</i>         | <i>terricola</i>      |
| Fruit juice-I  | 7/21/2011 | Watsonville, CA | Pacifica R  | UCDFST 11-956  | 2/17/2012 | 100   | 555 | GQ121603.1 | <i>Debaryomyces</i>   | <i>hansenii</i>       |
| Fruit juice-I  | 7/21/2011 | Watsonville, CA | Pacifica R  | UCDFST 11-1122 | 2/17/2012 | 100   | 551 | HM123744.1 | <i>Hanseniaspora</i>  | <i>occidentalis</i>   |
| Fruit juice-I  | 7/21/2011 | Watsonville, CA | Pacifica R  | UCDFST 11-962  | 2/17/2012 | 100   | 561 | JN083823.1 | <i>Hanseniaspora</i>  | <i>uvarum</i>         |
| Fruit juice-I  | 7/21/2011 | Watsonville, CA | Pacifica R  | UCDFST 11-1130 | 2/17/2012 | 99.79 | 489 | AF406914.1 | <i>Metschnikowia</i>  | <i>gruessii</i>       |
| Fruit juice-I  | 7/21/2011 | Watsonville, CA | Pacifica R  | UCDFST 11-1115 | 2/17/2012 | 99.62 | 531 | EF550233.1 | <i>Pichia</i>         | <i>terricola</i>      |

|               |           |               |             |                |           |       |     |            |                      |                     |
|---------------|-----------|---------------|-------------|----------------|-----------|-------|-----|------------|----------------------|---------------------|
| Fruit juice-I | 8/12/2011 | Corvallis, OR | Ranier C    | UCDFST 11-1046 | 2/17/2012 | 100   | 516 | GU585247.1 | <i>Aureobasidium</i> | <i>pullulans</i>    |
| Fruit juice-I | 8/12/2011 | Corvallis, OR | Ranier C    | UCDFST 11-1014 | 2/17/2012 | 99.81 | 541 | FJ748669.1 | <i>Candida</i>       | <i>railenensis</i>  |
| Fruit juice-I | 8/12/2011 | Corvallis, OR | Ranier C    | UCDFST 11-1166 | 2/17/2012 | 100   | 552 | HQ149311.1 | <i>Hanseniaspora</i> | <i>uvarum</i>       |
| Fruit juice-I | 8/12/2011 | Corvallis, OR | Ranier C    | UCDFST 11-1055 | 2/17/2012 | 100   | 474 | AY452049.1 | <i>Metschnikowia</i> | <i>chrysoperlae</i> |
| Fruit juice-I | 8/12/2011 | Corvallis, OR | Ranier C    | UCDFST 11-1039 | 2/17/2012 | 99.16 | 358 | HM191664.1 | <i>Metschnikowia</i> | <i>pulcherrima</i>  |
| Fruit juice-I | 6/23/2011 | Davis, CA     | Royal Ann C | UCDFST 11-881  | 2/17/2012 | 100   | 563 | JN712559.1 | <i>Aureobasidium</i> | <i>pullulans</i>    |
| Fruit juice-I | 6/23/2011 | Davis, CA     | Royal Ann C | UCDFST 11-875  | 2/17/2012 | 100   | 565 | HM988687.1 | <i>Hanseniaspora</i> | <i>uvarum</i>       |
| Fruit juice-I | 6/23/2011 | Davis, CA     | Royal Ann C | UCDFST 11-874  | 2/17/2012 | 98.97 | 489 | EU373454.1 | <i>Metschnikowia</i> | <i>fructicola</i>   |
| Fruit juice-I | 6/23/2011 | Davis, CA     | Royal Ann C | UCDFST 11-872  | 2/17/2012 | 99.79 | 488 | EU272042.1 | <i>Metschnikowia</i> | <i>pulcherrima</i>  |
| Fruit juice-I | 6/14/2011 | Davis, CA     | Unknown C   | UCDFST 11-846  | 2/17/2012 | 100   | 558 | HM988687.1 | <i>Hanseniaspora</i> | <i>uvarum</i>       |
| Fruit juice-I | 6/14/2011 | Davis, CA     | Unknown C   | UCDFST 11-861  | 2/17/2012 | 99.19 | 492 | EU373454.1 | <i>Metschnikowia</i> | <i>fructicola</i>   |
| Fruit juice-I | 6/14/2011 | Davis, CA     | Unknown C   | UCDFST 11-858  | 2/17/2012 | 99.79 | 492 | EU272042.1 | <i>Metschnikowia</i> | <i>pulcherrima</i>  |
| Fruit juice-I | 6/14/2011 | Davis, CA     | Unknown C   | UCDFST 11-860  | 2/17/2012 | 100   | 554 | FM180553.1 | <i>Pichia</i>        | <i>kluiveri</i>     |
| Fruit juice-I | 6/14/2011 | Davis, CA     | Unknown C   | UCDFST 11-838  | 2/17/2012 | 99.81 | 546 | U76345.1   | <i>Pichia</i>        | <i>terricola</i>    |

---
